# Supplementary material
Source: PubMed Central journal article supplement (PMC3130116)
Supplement: NIHMS258947-supplement-1_si_001.pdf [file NIHMS258947-supplement-1_si_001.pdf]

## **Supporting Information**

**for**

**S K-edge XAS and DFT Studies of High and Low Spin  
{FeNO}<sup>7</sup> Thiolate Complexes: Exchange Stabilization of  
Electron Delocalization in {FeNO}<sup>7</sup> and {FeO<sub>2</sub>}<sup>8</sup>**

Ning Sun, Lei V. Liu, Abhishek Dey, Gloria Villar-Acevedo, Julie A. Kovacs, Keith O.  
Hodgson, Britt Hedman, Edward I. Solomon

### **Estimation of oxidation state using pre-edge transition energy:**

The pre-edge energy of the d orbital can be expressed as the energy difference between Fe d orbital and S 1s orbital:

$$E_{\text{pre-edge}} = E_d - E_{1s} \quad (1)$$

Following Zener<sup>1</sup>, the energy of the d orbital can be expressed as a function of  $Z_{\text{eff}}$ :

$$E_d = -cZ_{\text{eff}}^2 \quad (2)$$

where c is a constant.

Using Slater's screening constants<sup>2</sup>, for Fe d electrons,  $Z_{\text{eff}}$  can be expressed as function of the oxidation state n:

$$Z_{\text{eff}} = 5.55 + 0.35n \quad (3)$$

Combine equations 1-3,

$$E_{\text{pre-edge}} = -c(5.55 + 0.35n)^2 - E_{1s} \quad (4)$$

The d-hole weighted pre-edge energy ( $E_{\text{pre-edge}}$ ) of Fe<sup>III</sup>-SOR is 2469.8 eV (3 transitions to  $t_2$  hole at 2469.4 eV, 2 transitions to e hole at 2470.5 eV), and the oxidation state n of Fe<sup>III</sup>-SOR is defined as 3.0. The d-hole weighted pre-edge energy of Fe<sup>II</sup>-SOR is 2472.5, (2 transitions to  $t_2$  hole at 2472.1 eV, 2 transitions to e hole are calculated by DFT to be higher than  $t_2$  hole by 0.9eV), and the oxidation state is defined as 2.0. Using the value of  $E_{\text{pre-edge}}$  and n of the reference complexes, we can obtain the value of the constants c and  $E_{1s}$ , and then the oxidation state of complex I and II can be obtained using the corresponding value of  $E_{\text{pre-edge}}$ . The oxidation state of complex I is calculated to be 2.75 from equation 4, using the weighted pre-edge energy of 2470.5 eV (3 transitions to  $t_2$  at 2470.1 eV and 2 transitions to e at 2471.0 eV). Similarly, the oxidation state of complex II is calculated to be 2.67 using 2470.7 eV as the weighted pre-edge energy (4 transitions at 2470.5 eV and 1 transition at 2471.6 eV).

**The MO compositions of Complex II (unoccupied) using different basis sets :**

**Table S1.** CP(PPP) for Fe and TZVP for the remaining atoms as in the literature<sup>3-5</sup>:

| MO          | Energy (ev) | Fe d (%) | NO 2p (%) |
|-------------|-------------|----------|-----------|
| 85 $\alpha$ | -2.062      | 42.5     | 7.7       |
| 86 $\alpha$ | -0.987      | 6.2      | 79.8      |
| 87 $\alpha$ | -0.797      | 8.5      | 79        |
| 84 $\beta$  | -1.195      | 63.8     | 25.8      |
| 85 $\beta$  | -0.988      | 62.2     | 26.1      |
| 86 $\beta$  | -0.765      | 62.5     | 6.6       |
| 87 $\beta$  | -0.162      | 68.9     | 0         |

**Table S2.** 6-311+G(3df) for Fe, S, N, O and 6-311+G\* for C, H (this study)

| MO          | Energy (eV) | Fe d (%) | NO 2p (%) |
|-------------|-------------|----------|-----------|
| 85 $\alpha$ | -1.952      | 42.8     | 7.1       |
| 86 $\alpha$ | -1.029      | 5.9      | 70.4      |
| 87 $\alpha$ | -0.828      | 8.8      | 74.4      |
| 84 $\beta$  | -1.222      | 61.5     | 23.9      |
| 85 $\beta$  | -1.024      | 60.4     | 25.4      |
| 86 $\beta$  | -0.871      | 58.2     | 10.6      |
| 87 $\beta$  | -0.106      | 66.4     | 0         |

**The MO compositions of model A and model C:**

**Table S3.** The MO compositions of model A (thiolates replaces by amines in complex II)

| MO          | Energy (eV) | Fe d (%) | NO 2p (%) |
|-------------|-------------|----------|-----------|
| 77 $\alpha$ | -9.806      | 61.5     | 1.52      |
| 78 $\alpha$ | -9.396      | 8.61     | 83.71     |
| 79 $\alpha$ | -9.342      | 7.62     | 85.11     |
| 76 $\beta$  | -9.609      | 51.23    | 42.99     |
| 77 $\beta$  | -9.571      | 58.3     | 34.5      |
| 78 $\beta$  | -9.056      | 67.4     | 9.91      |
| 79 $\beta$  | -8.273      | 73.75    | 0         |

**Table S4.** The MO compositions of model C (thiolates replaces by ammines in complex II + axial ligand)

| MO          | Energy (eV) | Fe d (%) | NO 2p (%) |
|-------------|-------------|----------|-----------|
| 84 $\alpha$ | -6.248      | 21.27    | 72.99     |
| 85 $\alpha$ | -4.609      | 71.2     | 0.12      |
| 86 $\alpha$ | -4.229      | 57.41    | 15.52     |
| 83 $\beta$  | -5.89       | 16.49    | 77.05     |
| 84 $\beta$  | -5.841      | 30.66    | 56.81     |
| 85 $\beta$  | -4.446      | 71.88    | 0.02      |
| 86 $\beta$  | -3.881      | 50.7     | 23.78     |

**Occupied orbitals of complex I, complex II and complex II + axial L:**

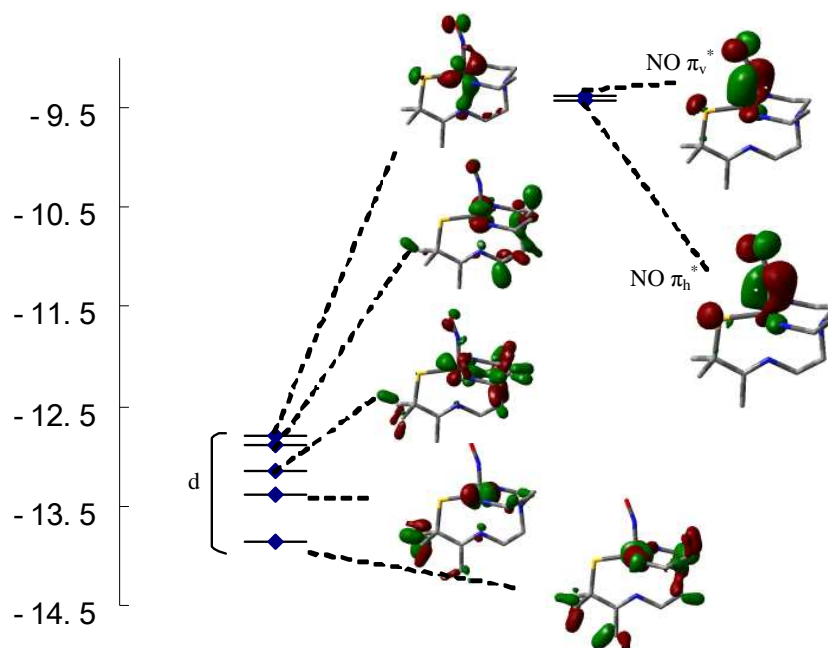

**Figure S1.** Occupied Fe d and NO  $\pi^*$  orbitals of complex I.

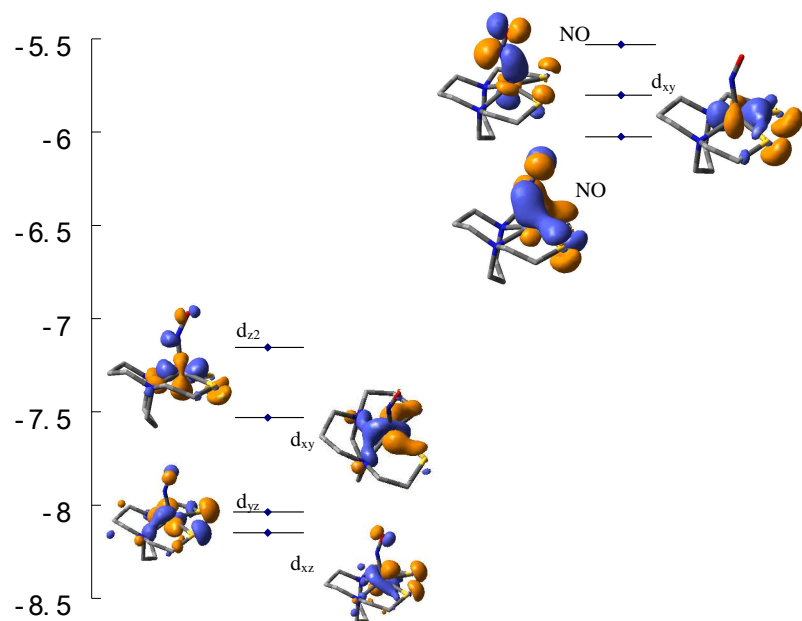

**Figure S2.** Occupied Fe d and NO  $\pi^*$  orbitals of complex II.

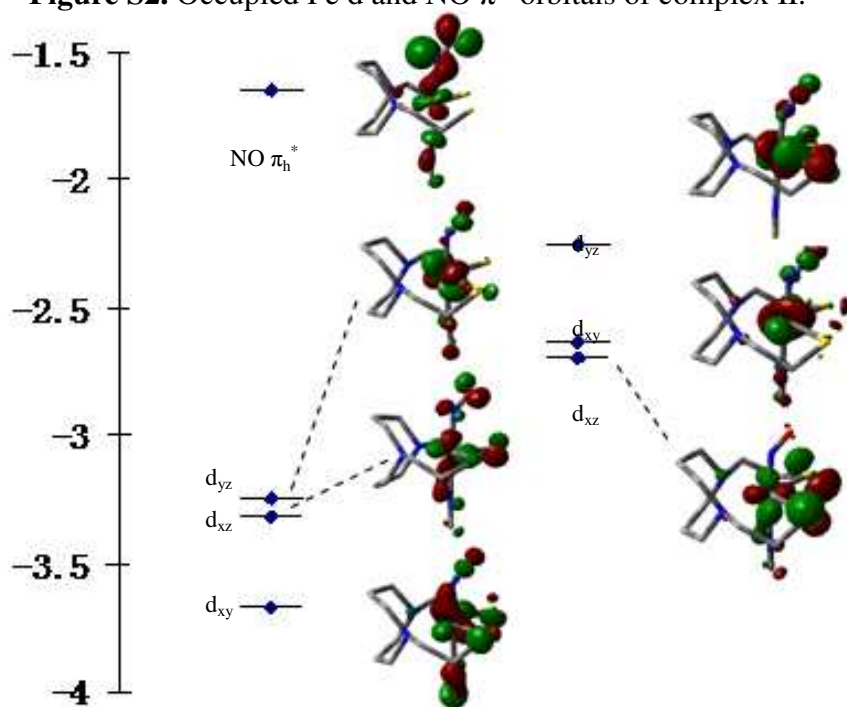

**Figure S3.** Occupied Fe d and NO  $\pi^*$  orbitals of complex II + axial L.

{FeO<sub>2</sub>}<sup>8</sup> Calculations

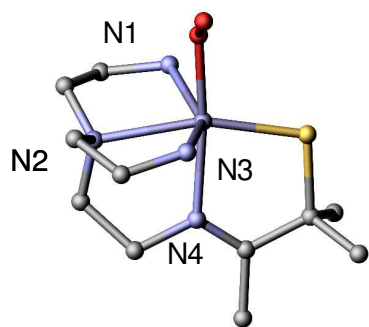

Fe<sup>III</sup>(S=5/2)-O<sub>2</sub>(S=1/2) S=2

|        |        |
|--------|--------|
| Fe-S   | 2.26 Å |
| Fe-O   | 1.97 Å |
| Fe-N1  | 2.23 Å |
| Fe-N2  | 2.32 Å |
| Fe-N3  | 2.21 Å |
| Fe-N4  | 2.18 Å |
| Fe-O-O | 125.9° |

Complex I

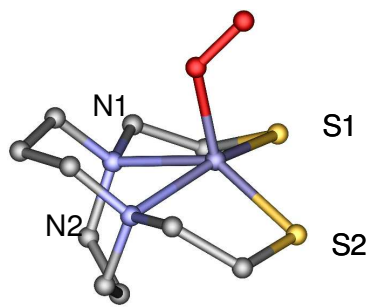

Fe<sup>III</sup>(S=3/2)-O<sub>2</sub>(S=1/2) S=1

|        |        |
|--------|--------|
| Fe-S1  | 2.24 Å |
| Fe-S2  | 2.25 Å |
| Fe-O   | 1.97 Å |
| Fe-N1  | 2.14 Å |
| Fe-N2  | 2.16 Å |
| Fe-O-O | 121.3° |

Complex II

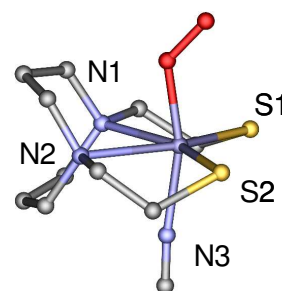

S=0

|        | Fe <sup>II</sup> (S=1/2)<br>O <sub>2</sub> (S=-1/2) | Fe <sup>I</sup> (S=0)<br>O <sub>2</sub> (S=0) |
|--------|-----------------------------------------------------|-----------------------------------------------|
| Fe-S1  | 2.29 Å                                              | 2.28 Å                                        |
| Fe-S2  | 2.29 Å                                              | 2.28 Å                                        |
| Fe-O   | 1.89 Å                                              | 1.76 Å                                        |
| Fe-N1  | 2.20 Å                                              | 2.19 Å                                        |
| Fe-N2  | 2.20 Å                                              | 2.19 Å                                        |
| Fe-N3  | 2.00 Å                                              | 2.01 Å                                        |
| Fe-O-O | 123.3°                                              | 123.7°                                        |

Complex II + axial L

**Figure S4.** Geometric parameters of the DFT calculated {FeO<sub>2</sub>}<sup>8</sup> system of complex I, complex II, and complex II + axial L.

### **Complete references for Gaussian 03 and 09:**

Gaussian 03, Revision C.02, Frisch, M. J.; Trucks, G. W.; Schlegel, H. B.; Scuseria, G. E.; Robb, M. A.; Cheeseman, J. R.; Montgomery, Jr., J. A.; Vreven, T.; Kudin, K. N.; Burant, J. C.; Millam, J. M.; Iyengar, S. S.; Tomasi, J.; Barone, V.; Mennucci, B.; Cossi, M.; Scalmani, G.; Rega, N.; Petersson, G. A.; Nakatsuji, H.; Hada, M.; Ehara, M.; Toyota, K.; Fukuda, R.; Hasegawa, J.; Ishida, M.; Nakajima, T.; Honda, Y.; Kitao, O.; Nakai, H.; Klene, M.; Li, X.; Knox, J. E.; Hratchian, H. P.; Cross, J. B.; Bakken, V.; Adamo, C.; Jaramillo, J.; Gomperts, R.; Stratmann, R. E.; Yazyev, O.; Austin, A. J.; Cammi, R.; Pomelli, C.; Ochterski, J. W.; Ayala, P. Y.; Morokuma, K.; Voth, G. A.; Salvador, P.; Dannenberg, J. J.; Zakrzewski, V. G.; Dapprich, S.; Daniels, A. D.; Strain, M. C.; Farkas, O.; Malick, D. K.; Rabuck, A. D.; Raghavachari, K.; Foresman, J. B.; Ortiz, J. V.; Cui, Q.; Baboul, A. G.; Clifford, S.; Cioslowski, J.; Stefanov, B. B.; Liu, G.; Liashenko, A.; Piskorz, P.; Komaromi, I.; Martin, R. L.; Fox, D. J.; Keith, T.; Al-Laham, M. A.; Peng, C. Y.; Nanayakkara, A.; Challacombe, M.; Gill, P. M. W.; Johnson, B.; Chen, W.; Wong, M. W.; Gonzalez, C.; and Pople, J. A.; Gaussian, Inc., Wallingford CT, 2004.

Gaussian 09, Revision A.02, Frisch, M. J.; Trucks, G. W.; Schlegel, H. B.; Scuseria, G. E.; Robb, M. A.; Cheeseman, J. R.; Scalmani, G.; Barone, V.; Mennucci, B.; Petersson, G. A.; Nakatsuji, H.; Caricato, M.; Li, X.; Hratchian, H. P.; Izmaylov, A. F.; Bloino, J.; Zheng, G.; Sonnenberg, J. L.; Hada, M.; Ehara, M.; Toyota, K.; Fukuda, R.; Hasegawa, J.; Ishida, M.; Nakajima, T.; Honda, Y.; Kitao, O.; Nakai, H.; Vreven, T.; Montgomery, Jr., J. A.; Peralta, J. E.; Ogliaro, F.; Bearpark, M.; Heyd, J. J.; Brothers, E.; Kudin, K. N.; Staroverov, V. N.; Kobayashi, R.; Normand, J.; Raghavachari, K.; Rendell, A.; Burant, J. C.; Iyengar, S. S.; Tomasi, J.; Cossi, M.; Rega, N.; Millam, N. J.; Klene, M.; Knox, J. E.; Cross, J. B.; Bakken, V.; Adamo, C.; Jaramillo, J.; Gomperts, R.; Stratmann, R. E.; Yazyev, O.; Austin, A. J.; Cammi, R.; Pomelli, C.; Ochterski, J. W.; Martin, R. L.; Morokuma, K.; Zakrzewski, V. G.; Voth, G. A.; Salvador, P.; Dannenberg, J. J.; Dapprich, S.; Daniels, A. D.; Farkas, Ö.; Foresman, J. B.; Ortiz, J. V.; Cioslowski, J.; Fox, D. J. Gaussian, Inc., Wallingford CT, 2009.

### **Optimized geometries:**

## Complex I

|    |          |          |          |
|----|----------|----------|----------|
| C  | -3.76482 | 0.29278  | -1.13859 |
| H  | -3.24119 | 0.18065  | -2.09055 |
| H  | -4.25053 | 1.26942  | -1.14499 |
| H  | -4.54968 | -0.46582 | -1.08179 |
| C  | -2.78864 | 0.21765  | 0.05993  |
| C  | -2.04723 | -1.11364 | 0.03144  |
| C  | -2.87305 | -2.37975 | 0.02357  |
| H  | -2.60666 | -3.02546 | 0.86548  |
| H  | -2.69272 | -2.95578 | -0.88935 |
| C  | -0.02711 | -2.38426 | -0.13228 |
| H  | -0.50969 | -3.21617 | 0.38918  |
| C  | 1.40161  | -2.25658 | 0.42176  |
| H  | 1.35351  | -2.41236 | 1.49815  |
| H  | 2.01923  | -3.07268 | 0.02650  |
| C  | 1.99970  | -0.18230 | 2.55784  |
| H  | 1.55621  | -1.07809 | 2.99408  |
| H  | 2.63270  | 0.25239  | 3.33638  |
| C  | 2.87101  | -0.52999 | 1.34855  |
| H  | 3.44084  | 0.35311  | 1.05067  |
| H  | 3.60034  | -1.30281 | 1.62809  |
| N  | -0.76564 | -1.12985 | -0.00121 |
| N  | 0.90402  | 0.73294  | 2.16259  |
| H  | 0.06029  | 0.54909  | 2.69475  |
| N  | 2.05785  | -0.94602 | 0.17972  |
| N  | 1.30669  | 2.27771  | -0.31997 |
| O  | 1.51341  | 3.39728  | -0.56263 |
| S  | -1.64094 | 1.66426  | -0.07661 |
| Fe | 0.43622  | 0.72377  | -0.08132 |
| C  | -3.57903 | 0.34074  | 1.38263  |
| H  | -2.91755 | 0.29752  | 2.25071  |
| H  | -4.09699 | 1.30042  | 1.40881  |
| H  | -4.33273 | -0.44569 | 1.48402  |
| H  | -3.93939 | -2.18326 | 0.08539  |
| H  | -0.01515 | -2.66419 | -1.19053 |
| C  | 1.99815  | -0.95345 | -2.32022 |
| H  | 1.50636  | -1.91978 | -2.43114 |
| H  | 2.64312  | -0.83662 | -3.19601 |
| C  | 2.86318  | -0.92345 | -1.06090 |
| H  | 3.44767  | -0.00015 | -1.05411 |
| H  | 3.57923  | -1.75667 | -1.08555 |
| N  | 0.95889  | 0.10227  | -2.25559 |
| H  | 0.12693  | -0.17000 | -2.76908 |
| H  | 1.28892  | 0.95402  | -2.69942 |
| H  | 1.14746  | 1.69848  | 2.36022  |

## Complex II

|    |          |          |          |
|----|----------|----------|----------|
| Fe | 0.00024  | -0.59444 | 0.20377  |
| S  | -1.56014 | -1.99883 | -0.63424 |
| S  | 1.56205  | -1.99838 | -0.63255 |
| N  | -1.45716 | 0.97163  | -0.00759 |



|                                |          |          |          |
|--------------------------------|----------|----------|----------|
| N                              | 1.45618  | 0.97298  | -0.00827 |
| N                              | 0.00075  | -0.85890 | 1.96852  |
| O                              | 0.00183  | -1.59894 | 2.89308  |
| C                              | -3.02242 | -0.87892 | -0.68005 |
| H                              | -3.23901 | -0.60249 | -1.71873 |
| H                              | -3.90137 | -1.41436 | -0.30424 |
| C                              | -2.80550 | 0.34907  | 0.18826  |
| H                              | -3.58438 | 1.11010  | 0.00844  |
| H                              | -2.85481 | 0.05681  | 1.24075  |
| C                              | -1.29324 | 2.00195  | 1.05760  |
| H                              | -2.14588 | 2.69849  | 1.00606  |
| H                              | -1.34729 | 1.47735  | 2.01548  |
| C                              | -0.00106 | 2.81259  | 0.98555  |
| H                              | -0.00122 | 3.49711  | 1.84288  |
| H                              | -0.00161 | 3.45740  | 0.09989  |
| C                              | 1.29193  | 2.00318  | 1.05700  |
| H                              | 2.14391  | 2.70047  | 1.00500  |
| H                              | 1.34692  | 1.47866  | 2.01487  |
| C                              | -1.32385 | 1.58761  | -1.37174 |
| H                              | -1.48630 | 2.67085  | -1.29561 |
| H                              | -2.12867 | 1.19681  | -1.99821 |
| C                              | -0.00110 | 1.26559  | -2.08651 |
| H                              | -0.00064 | 0.19830  | -2.33692 |
| H                              | -0.00161 | 1.80935  | -3.04128 |
| C                              | 1.32163  | 1.58900  | -1.37235 |
| H                              | 2.12665  | 1.19922  | -1.99920 |
| H                              | 1.48290  | 2.67240  | -1.29616 |
| C                              | 2.80524  | 0.35162  | 0.18673  |
| H                              | 3.58330  | 1.11331  | 0.00620  |
| H                              | 2.85556  | 0.05952  | 1.23922  |
| C                              | 3.02242  | -0.87623 | -0.68163 |
| H                              | 3.90295  | -1.41020 | -0.30741 |
| H                              | 3.23662  | -0.59969 | -1.72078 |
| Complex II + axial L (model B) |          |          |          |
| Fe                             | 0.02886  | -0.63404 | -0.08565 |
| S                              | 1.85542  | -2.07437 | 0.05488  |
| S                              | -1.68855 | -2.21403 | 0.04482  |
| N                              | 1.41597  | 1.07643  | -0.11347 |
| N                              | -1.50641 | 0.97379  | -0.12574 |
| N                              | 0.02151  | -0.81416 | -1.80325 |
| O                              | 0.11014  | -1.57068 | -2.70898 |
| C                              | 2.95211  | -0.75879 | 0.70498  |
| H                              | 2.73702  | -0.57538 | 1.76117  |
| H                              | 3.99366  | -1.09243 | 0.63217  |
| C                              | 2.80582  | 0.51007  | -0.12429 |
| H                              | 3.50832  | 1.29721  | 0.20183  |
| H                              | 3.04597  | 0.26129  | -1.15962 |
| C                              | 1.24713  | 1.86863  | -1.35804 |
| H                              | 2.04215  | 2.63264  | -1.40449 |
| H                              | 1.41564  | 1.17956  | -2.18449 |

|                              |          |          |          |
|------------------------------|----------|----------|----------|
| C                            | -0.09706 | 2.58079  | -1.57014 |
| H                            | -0.10398 | 2.90404  | -2.61886 |
| H                            | -0.13069 | 3.50594  | -0.99598 |
| C                            | -1.39016 | 1.77662  | -1.36734 |
| H                            | -2.23714 | 2.48248  | -1.41874 |
| H                            | -1.50052 | 1.07679  | -2.19465 |
| C                            | 1.26206  | 1.91563  | 1.10610  |
| C                            | -0.10967 | 2.56908  | 1.38061  |
| C                            | -1.42585 | 1.81439  | 1.09751  |
| C                            | -2.84137 | 0.29186  | -0.14619 |
| H                            | -3.61172 | 1.01614  | 0.17337  |
| H                            | -3.05114 | 0.02154  | -1.18268 |
| C                            | -2.88547 | -0.98310 | 0.68612  |
| H                            | -3.89711 | -1.39906 | 0.61535  |
| H                            | -2.68479 | -0.77953 | 1.74109  |
| H                            | -0.12033 | 2.77510  | 2.45667  |
| H                            | -0.14504 | 3.55169  | 0.90650  |
| H                            | -2.23373 | 2.56533  | 1.05575  |
| H                            | -1.63179 | 1.15326  | 1.93230  |
| H                            | 1.51458  | 1.27722  | 1.94540  |
| H                            | 2.00973  | 2.72599  | 1.06329  |
| N                            | 0.01460  | -0.54942 | 1.98386  |
| C                            | 0.00909  | -0.53875 | 3.15542  |
| Complex II, S to N (model A) |          |          |          |
| Fe                           | 0.00160  | -0.72067 | -0.03923 |
| N                            | -1.53510 | -1.85733 | -0.85013 |
| N                            | 1.53823  | -1.84487 | -0.86656 |
| N                            | -1.42568 | 0.76491  | 0.07132  |
| N                            | 1.42037  | 0.77079  | 0.07047  |
| N                            | 0.00934  | -1.43082 | 1.56609  |
| O                            | 0.01265  | -2.12152 | 2.49105  |
| C                            | -2.75521 | -0.99982 | -1.03710 |
| H                            | -2.70221 | -0.56196 | -2.03461 |
| H                            | -3.66652 | -1.59947 | -0.99507 |
| C                            | -2.75372 | 0.06193  | 0.04662  |
| H                            | -3.56362 | 0.78217  | -0.10334 |
| H                            | -2.90569 | -0.39612 | 1.02646  |
| C                            | -1.30166 | 1.52589  | 1.36691  |
| H                            | -2.15213 | 2.21215  | 1.44127  |
| H                            | -1.40152 | 0.80088  | 2.17570  |
| C                            | -0.00606 | 2.32077  | 1.51523  |
| H                            | -0.00646 | 2.74478  | 2.52376  |
| H                            | -0.00850 | 3.19017  | 0.85474  |
| C                            | 1.29325  | 1.53245  | 1.36554  |
| H                            | 2.14026  | 2.22313  | 1.43811  |
| H                            | 1.39804  | 0.80865  | 2.17476  |
| C                            | -1.30298 | 1.70830  | -1.11257 |
| H                            | -1.41234 | 2.73337  | -0.75603 |
| H                            | -2.14378 | 1.53182  | -1.78257 |
| C                            | -0.00462 | 1.53766  | -1.90102 |

|   |          |          |          |
|---|----------|----------|----------|
| H | -0.00348 | 0.56002  | -2.40572 |
| H | -0.00630 | 2.26949  | -2.71503 |
| C | 1.29440  | 1.71222  | -1.11428 |
| H | 2.13451  | 1.53646  | -1.78530 |
| H | 1.40213  | 2.73800  | -0.75905 |
| C | 2.75112  | 0.07223  | 0.04851  |
| H | 3.55891  | 0.79578  | -0.09723 |
| H | 2.90106  | -0.38706 | 1.02797  |
| C | 2.76097  | -0.98755 | -1.03723 |
| H | 3.67057  | -1.58906 | -0.98674 |
| H | 2.72004  | -0.54794 | -2.03446 |
| H | -1.32739 | -2.33817 | -1.72413 |
| H | -1.75461 | -2.60654 | -0.19442 |
| H | 1.75501  | -2.60969 | -0.22830 |
| H | 1.32805  | -2.30466 | -1.75122 |

Complex II + axial L, S to N (model C)

|    |          |          |          |
|----|----------|----------|----------|
| Fe | 0.02674  | -0.66990 | -0.13036 |
| N  | 1.64347  | -1.92563 | -0.01086 |
| N  | -1.48541 | -2.05657 | -0.04932 |
| N  | 1.37716  | 0.89401  | -0.03407 |
| N  | -1.45329 | 0.77726  | -0.08226 |
| N  | 0.06141  | -0.79800 | -1.89548 |
| O  | 0.18968  | -1.65339 | -2.69208 |
| C  | 2.77166  | -1.10693 | 0.52608  |
| H  | 2.63327  | -1.03737 | 1.60300  |
| H  | 3.73564  | -1.58828 | 0.34104  |
| C  | 2.73649  | 0.26128  | -0.13650 |
| H  | 3.49842  | 0.92048  | 0.29239  |
| H  | 2.96814  | 0.15400  | -1.19869 |
| C  | 1.24433  | 1.85798  | -1.17728 |
| H  | 2.04869  | 2.59930  | -1.09742 |
| H  | 1.42669  | 1.28694  | -2.08769 |
| C  | -0.09244 | 2.59438  | -1.30500 |
| H  | -0.09352 | 3.05599  | -2.29797 |
| H  | -0.14320 | 3.43143  | -0.61331 |
| C  | -1.36401 | 1.74421  | -1.22612 |
| H  | -2.23192 | 2.41341  | -1.18130 |
| H  | -1.45964 | 1.15574  | -2.13839 |
| C  | 1.25291  | 1.59682  | 1.28910  |
| C  | -0.12074 | 2.21035  | 1.63647  |
| C  | -1.42897 | 1.49036  | 1.24169  |
| C  | -2.75197 | 0.03304  | -0.22170 |
| H  | -3.57817 | 0.62750  | 0.18219  |
| H  | -2.94346 | -0.09455 | -1.28971 |
| C  | -2.69301 | -1.33060 | 0.44742  |
| H  | -3.60775 | -1.89099 | 0.23656  |
| H  | -2.59421 | -1.24625 | 1.52755  |
| H  | -0.14313 | 2.28589  | 2.72743  |
| H  | -0.15521 | 3.24117  | 1.28887  |
| H  | -2.23716 | 2.23216  | 1.23671  |

|   |          |          |          |
|---|----------|----------|----------|
| H | -1.66898 | 0.74874  | 1.99607  |
| H | 1.52539  | 0.87377  | 2.05036  |
| H | 1.99956  | 2.40029  | 1.31250  |
| N | 0.00765  | -0.96122 | 1.84958  |
| C | 0.00075  | -1.36529 | 2.95255  |
| H | -1.68858 | -2.52119 | -0.93303 |
| H | -1.24765 | -2.78562 | 0.61856  |
| H | 1.45118  | -2.68122 | 0.64194  |
| H | 1.90607  | -2.35942 | -0.89498 |

- (1) Zener, C. *Phys. Rev.* **1930**, *36*, 0051-0056.
- (2) Slater, J. C. *Phys. Rev.* **1930**, *36*, 0057-0064.
- (3) Serres, R. G.; Grapperhaus, C. A.; Bothe, E.; Bill, E.; Weyhermüller, T.; Neese, F.; Wieghardt, K. *J. Am. Chem. Soc.* **2004**, *126*, 5138-5153.
- (4) Praneeth, V. K. K.; Nather, C.; Peters, G.; Lehnert, N. *Inorg. Chem.* **2006**, *45*, 2795-2811.
- (5) Li, M.; Bonnet, D.; Bill, E.; Neese, F.; Weyhermüller, T.; Blum, N.; Sellman, D.; Wieghardt, K. *Inorg. Chem.* **2002**, *41*, 3444-3456.
